# Supplementary material for: An Assessment of Dispersion-Corrected DFT Methods for Modeling Nonbonded Interactions in Protein Kinase Inhibitor Complexes
Source: MDPI journal article supplement (doi:10.3390/molecules29020304), 2024-01-06
Supplement: s1 [file s1]

**Table S1.** Gas phase intermolecular interaction energies (in kcal/mol) at the DFT/Def2-SVP level for the 49 binding motifs of PKIs in protein kinases.

| No. | Interaction   | PDB ID | CCSD(T)<br>/CBS | DFT/Def2-SVP |      |      |               |       |       |        |        |        |
|-----|---------------|--------|-----------------|--------------|------|------|---------------|-------|-------|--------|--------|--------|
|     |               |        |                 | BLYP         | TPSS | B97  | $\omega$ B97X | B3LYP | M062X | PW6B95 | B2PLYP | PWBP95 |
| 1   | CH- $\pi$     | 1H1Q   | -1.9            | -1.7         | -1.5 | -1.8 | -1.7          | -1.7  | -1.4  | -1.5   | -1.1   | -1.1   |
| 2   |               | 4BDB   | -2.2            | -2.2         | -2.4 | -2.5 | -2.5          | -2.2  | -1.3  | -2.3   | -1.7   | -1.9   |
| 3   |               | 2BTS   | -2.4            | -2.3         | -2.2 | -2.5 | -2.5          | -2.4  | -1.3  | -2.0   | -1.5   | -1.5   |
| 4   |               | 2XIY   | -2.3            | -2.1         | -2.1 | -2.4 | -2.3          | -2.1  | -1.5  | -2.2   | -1.4   | -1.7   |
| 5   |               | 1UU9   | -3.6            | -3.7         | -3.5 | -4.0 | -3.9          | -3.7  | -2.2  | -3.1   | -2.7   | -2.7   |
| 6   |               | 2IO6   | -0.7            | -0.7         | -0.9 | -0.9 | -0.7          | -0.7  | -0.1  | -0.7   | -0.5   | -0.5   |
| 7   |               | 4GUE   | -3.4            | -3.4         | -3.1 | -3.5 | -3.6          | -3.4  | -2.4  | -3.1   | -2.3   | -2.5   |
| 8   |               | 3OOG   | -1.9            | -1.8         | -1.6 | -1.9 | -1.8          | -1.8  | -1.3  | -1.6   | -1.1   | -1.1   |
| 9   |               | 4FKO   | -2.3            | -2.5         | -2.5 | -2.8 | -2.6          | -2.5  | -1.0  | -2.0   | -1.7   | -1.5   |
| 10  |               | 3QL8   | -2.5            | -2.5         | -2.3 | -2.8 | -2.5          | -2.5  | -1.7  | -2.2   | -1.3   | -1.6   |
| 11  |               | 4RC2   | -2.1            | -2.0         | -1.9 | -2.4 | -2.2          | -2.1  | -1.2  | -1.5   | -1.2   | -1.1   |
| 12  |               | 4RC3   | -1.0            | -0.9         | -0.8 | -1.1 | -0.9          | -0.9  | -0.4  | -0.4   | -0.2   | -0.1   |
| 13  |               | 3QX4   | -1.0            | -0.9         | -1.0 | -1.2 | -1.0          | -1.0  | -0.4  | -0.9   | -0.5   | -0.6   |
| 14  | $\pi$ - $\pi$ | 2V7O   | -1.3            | -1.5         | -1.4 | -1.6 | -1.3          | -1.4  | -0.2  | -1.1   | -1.0   | -0.9   |
| 15  |               | 3I4B   | -1.0            | -1.0         | -1.2 | -1.3 | -1.1          | -1.0  | -0.4  | -1.1   | -0.8   | -0.9   |
| 16  |               | 4DGO   | -4.4            | -4.5         | -4.3 | -4.8 | -4.5          | -4.5  | -3.4  | -4.4   | -3.5   | -3.8   |
| 17  |               | 3QQF   | -2.4            | -2.2         | -2.2 | -2.4 | -2.1          | -2.3  | -1.6  | -2.1   | -1.9   | -1.8   |
| 18  |               | 3B2T   | -2.0            | -1.7         | -1.9 | -2.0 | -1.7          | -1.8  | -0.8  | -1.7   | -1.4   | -1.4   |
| 19  |               | 3R6X   | -1.9            | -1.9         | -1.9 | -2.2 | -1.7          | -2.0  | -0.9  | -1.7   | -1.5   | -1.4   |
| 20  |               | 4WG4   | -0.6            | -0.6         | -0.7 | -0.8 | -0.5          | -0.5  | 0.0   | -0.6   | -0.4   | -0.4   |
| 21  |               | 1PXN   | -0.7            | -0.7         | -0.8 | -0.9 | -0.6          | -0.6  | 0.1   | -0.6   | -0.4   | -0.4   |
| 22  |               | 3ROY   | -2.4            | -2.2         | -2.2 | -2.4 | -2.2          | -2.3  | -1.6  | -2.1   | -1.9   | -1.9   |
| 23  |               | 2C6O   | -1.1            | -1.0         | -1.1 | -1.2 | -1.0          | -0.9  | -0.3  | -1.0   | -0.7   | -0.8   |
| 24  |               | 3RAK   | -1.7            | -1.6         | -1.7 | -1.8 | -1.6          | -1.6  | -0.8  | -1.4   | -1.3   | -1.2   |
| 25  |               | 4EL9   | -1.9            | -2.0         | -1.9 | -2.3 | -2.0          | -1.8  | -1.0  | -1.6   | -1.0   | -1.2   |

(Continued)

Table S1 (Continued)

| No. | Interaction   | PDB ID | CCSD(T)<br>/CBS | DFT/Def2-SVP |        |        |               |        |        |        |        |        |
|-----|---------------|--------|-----------------|--------------|--------|--------|---------------|--------|--------|--------|--------|--------|
|     |               |        |                 | BLYP         | TPSS   | B97    | $\omega$ B97X | B3LYP  | M062X  | PW6B95 | B2PLYP | PWPB95 |
| 26  | Cation- $\pi$ | 1PXL   | -6.5            | -6.2         | -6.2   | -6.3   | -6.3          | -6.3   | -5.9   | -6.3   | -6.2   | -6.2   |
| 27  |               | 1FGI   | -4.4            | -4.9         | -4.9   | -5.0   | -4.4          | -4.7   | -3.6   | -4.5   | -4.3   | -4.2   |
| 28  |               | 1M2Q   | -2.0            | -2.8         | -2.6   | -2.8   | -2.0          | -2.4   | -0.7   | -2.0   | -1.8   | -1.6   |
| 29  |               | 2VGP   | -1.5            | -1.5         | -1.5   | -1.5   | -1.4          | -1.4   | -1.1   | -1.4   | -1.3   | -1.3   |
| 30  |               | 3OWP   | -9.2            | -9.8         | -9.6   | -10.1  | -9.5          | -9.7   | -8.3   | -9.4   | -8.7   | -8.8   |
| 31  |               | 3SQQ   | -2.1            | -2.4         | -2.4   | -2.5   | -2.1          | -2.3   | -1.1   | -2.0   | -1.8   | -1.6   |
| 32  |               | 3RJC   | -2.1            | -2.4         | -2.3   | -2.5   | -2.0          | -2.2   | -1.2   | -2.0   | -1.8   | -1.7   |
| 33  |               | 3QTW   | -8.4            | -10.4        | -9.6   | -10.2  | -8.3          | -9.7   | -7.8   | -8.9   | -8.7   | -8.3   |
| 34  | H-Bonding     | 3SW4   | -6.0            | -4.7         | -4.7   | -4.1   | -4.5          | -5.4   | -3.5   | -3.9   | -4.0   | -3.3   |
| 35  |               | 3ZLY   | -4.9            | -4.2         | -4.2   | -3.9   | -4.0          | -4.6   | -3.0   | -3.6   | -3.8   | -3.2   |
| 36  |               | 3RZB   | -7.0            | -6.1         | -5.9   | -5.6   | -5.8          | -6.5   | -4.9   | -5.2   | -5.3   | -4.7   |
| 37  |               | 3RPY   | -7.0            | -5.8         | -5.6   | -5.2   | -5.7          | -6.4   | -5.1   | -5.3   | -5.4   | -4.9   |
| 38  |               | 3R28   | -4.8            | -3.1         | -3.0   | -2.4   | -2.9          | -3.6   | -2.7   | -2.8   | -2.8   | -2.3   |
| 39  |               | 3QZI   | -4.6            | -3.5         | -3.3   | -2.8   | -3.3          | -3.9   | -3.1   | -3.1   | -3.1   | -2.7   |
| 40  |               | 3SXF   | -3.8            | -2.7         | -2.7   | -2.2   | -2.5          | -3.1   | -2.0   | -2.2   | -2.3   | -1.8   |
| 41  |               | 2R3P   | -6.1            | -4.5         | -4.2   | -3.8   | -4.3          | -4.9   | -3.8   | -4.0   | -4.1   | -3.6   |
| 42  | Salt bridge   | 3MA3   | -111.0          | -113.5       | -112.9 | -112.7 | -112.8        | -113.4 | -112.1 | -112.7 | -112.0 | -111.9 |
| 43  |               | 4L9I   | -100.3          | -103.8       | -103.2 | -103.0 | -102.3        | -103.1 | -100.8 | -102.0 | -101.8 | -101.2 |
| 44  |               | 1NVQ   | -100.0          | -101.2       | -100.9 | -100.5 | -101.2        | -101.5 | -100.3 | -100.6 | -100.1 | -99.8  |
| 45  |               | 4JIK   | -115.9          | -118.7       | -118.3 | -118.2 | -118.4        | -118.9 | -117.2 | -117.5 | -117.4 | -116.6 |
| 46  |               | 1BX6   | -68.2           | -72.2        | -70.1  | -70.7  | -68.4         | -68.8  | -68.0  | -68.7  | -68.3  | -68.3  |
| 47  |               | 4WG4   | -92.6           | -95.1        | -93.9  | -94.1  | -93.0         | -94.0  | -92.2  | -93.1  | -92.8  | -92.4  |
| 48  |               | 4MTA   | -106.6          | -108.9       | -108.5 | -108.2 | -108.6        | -109.0 | -106.7 | -107.7 | -107.6 | -106.9 |
| 49  |               | 1E9H   | -101.5          | -103.2       | -102.1 | -102.1 | -102.7        | -103.5 | -102.6 | -102.6 | -102.1 | -101.9 |

**Table S2.** Gas phase intermolecular interaction energies (in kcal/mol) at the DFT/Def2-TZVP level for the 49 binding motifs of PKIs in protein kinases.

| No. | Interaction   | PDB ID | CCSD(T)<br>/CBS | DFT/Def2-TZVP |      |      |               |       |       |        |        |        |
|-----|---------------|--------|-----------------|---------------|------|------|---------------|-------|-------|--------|--------|--------|
|     |               |        |                 | BLYP          | TPSS | B97  | $\omega$ B97X | B3LYP | M062X | PW6B95 | B2PLYP | PWPB95 |
| 1   | CH- $\pi$     | 1H1Q   | -1.9            | -1.6          | -1.5 | -1.8 | -1.8          | -1.7  | -1.4  | -1.6   | -1.4   | -1.4   |
| 2   |               | 4BDB   | -2.2            | -2.1          | -2.4 | -2.5 | -2.6          | -2.2  | -1.4  | -2.4   | -2.0   | -2.1   |
| 3   |               | 2BTS   | -2.4            | -2.3          | -2.2 | -2.5 | -2.6          | -2.4  | -1.5  | -2.1   | -1.9   | -1.8   |
| 4   |               | 2XIY   | -2.3            | -2.0          | -2.1 | -2.4 | -2.5          | -2.1  | -1.6  | -2.2   | -1.8   | -1.9   |
| 5   |               | 1UU9   | -3.6            | -3.7          | -3.6 | -4.0 | -4.0          | -3.7  | -2.4  | -3.2   | -3.2   | -2.9   |
| 6   |               | 2IO6   | -0.7            | -0.7          | -0.8 | -0.9 | -0.7          | -0.7  | -0.1  | -0.7   | -0.6   | -0.5   |
| 7   |               | 4GUE   | -3.4            | -3.3          | -3.1 | -3.5 | -3.8          | -3.4  | -2.6  | -3.2   | -2.8   | -2.8   |
| 8   |               | 3OOG   | -1.9            | -1.7          | -1.6 | -1.9 | -2.0          | -1.9  | -1.5  | -1.7   | -1.5   | -1.4   |
| 9   |               | 4FKO   | -2.3            | -2.5          | -2.5 | -2.9 | -2.7          | -2.5  | -1.1  | -2.0   | -2.0   | -1.7   |
| 10  |               | 3QL8   | -2.5            | -2.4          | -2.2 | -2.8 | -2.7          | -2.5  | -1.9  | -2.3   | -1.9   | -1.9   |
| 11  |               | 4RC2   | -2.1            | -2.0          | -2.0 | -2.4 | -2.4          | -2.1  | -1.4  | -1.6   | -1.7   | -1.4   |
| 12  |               | 4RC3   | -1.0            | -0.8          | -0.8 | -1.1 | -1.0          | -0.9  | -0.6  | -0.6   | -0.6   | -0.4   |
| 13  |               | 3QX4   | -1.0            | -0.9          | -1.0 | -1.2 | -1.1          | -1.0  | -0.5  | -0.9   | -0.7   | -0.7   |
| 14  | $\pi$ - $\pi$ | 2V7O   | -1.3            | -1.4          | -1.4 | -1.6 | -1.3          | -1.4  | -0.2  | -1.1   | -1.1   | -0.9   |
| 15  |               | 3I4B   | -1.0            | -1.0          | -1.3 | -1.3 | -1.2          | -1.0  | -0.5  | -1.2   | -0.9   | -1.0   |
| 16  |               | 4DGO   | -4.4            | -4.5          | -4.4 | -4.9 | -4.7          | -4.6  | -3.6  | -4.4   | -4.1   | -4.1   |
| 17  |               | 3QQF   | -2.4            | -2.2          | -2.3 | -2.5 | -2.3          | -2.4  | -1.8  | -2.2   | -2.2   | -2.1   |
| 18  |               | 3B2T   | -2.0            | -1.8          | -2.0 | -2.1 | -1.9          | -1.9  | -1.0  | -1.8   | -1.7   | -1.6   |
| 19  |               | 3R6X   | -1.9            | -1.9          | -1.9 | -2.2 | -1.8          | -2.0  | -1.0  | -1.7   | -1.7   | -1.5   |
| 20  |               | 4WG4   | -0.6            | -0.5          | -0.7 | -0.7 | -0.6          | -0.5  | 0.0   | -0.6   | -0.5   | -0.5   |
| 21  |               | 1PXN   | -0.7            | -0.6          | -0.8 | -0.9 | -0.7          | -0.7  | 0.0   | -0.6   | -0.6   | -0.5   |
| 22  |               | 3ROY   | -2.4            | -2.2          | -2.3 | -2.5 | -2.3          | -2.4  | -1.8  | -2.2   | -2.2   | -2.1   |
| 23  |               | 2C6O   | -1.1            | -0.9          | -1.2 | -1.2 | -1.1          | -1.0  | -0.4  | -1.1   | -0.9   | -0.9   |
| 24  |               | 3RAK   | -1.7            | -1.6          | -1.7 | -1.9 | -1.7          | -1.7  | -0.9  | -1.5   | -1.5   | -1.3   |
| 25  |               | 4EL9   | -1.9            | -2.1          | -2.0 | -2.4 | -2.0          | -2.0  | -1.0  | -1.6   | -1.6   | -1.4   |
| 26  | Cation- $\pi$ | 1PXL   | -6.5            | -6.5          | -6.5 | -6.6 | -6.6          | -6.6  | -6.2  | -6.6   | -6.5   | -6.5   |
| 27  |               | 1FGI   | -4.4            | -4.8          | -4.9 | -5.0 | -4.5          | -4.7  | -3.7  | -4.6   | -4.4   | -4.3   |
| 28  |               | 1M2Q   | -2.0            | -2.7          | -2.7 | -2.9 | -2.2          | -2.4  | -1.0  | -2.2   | -2.0   | -1.8   |

(Continued)

Table S2 (Continued)

| No. | Interaction   | PDB ID | CCSD(T)<br>/CBS | DFT/Def2-TZVP |        |        |               |        |        |        |        |        |
|-----|---------------|--------|-----------------|---------------|--------|--------|---------------|--------|--------|--------|--------|--------|
|     |               |        |                 | BLYP          | TPSS   | B97    | $\omega$ B97X | B3LYP  | M062X  | PW6B95 | B2PLYP | PWPB95 |
| 29  | Cation- $\pi$ | 2VGP   | -1.5            | -1.6          | -1.6   | -1.7   | -1.5          | -1.5   | -1.3   | -1.6   | -1.5   | -1.5   |
| 30  |               | 3OWP   | -9.2            | -9.9          | -9.8   | -10.3  | -9.8          | -9.9   | -8.6   | -9.6   | -9.2   | -9.1   |
| 31  |               | 3SQQ   | -2.1            | -2.3          | -2.4   | -2.5   | -2.2          | -2.2   | -1.2   | -2.0   | -1.9   | -1.7   |
| 32  |               | 3RJC   | -2.1            | -2.3          | -2.4   | -2.6   | -2.1          | -2.2   | -1.4   | -2.1   | -2.0   | -1.9   |
| 33  |               | 3QTW   | -8.4            | -9.8          | -9.3   | -9.9   | -8.3          | -9.3   | -7.8   | -8.7   | -8.5   | -8.2   |
| 34  | H-Bonding     | 3SW4   | -6.0            | -4.5          | -4.2   | -3.8   | -3.9          | -5.0   | -2.9   | -3.3   | -4.3   | -3.1   |
| 35  |               | 3ZLY   | -4.9            | -3.9          | -3.8   | -3.5   | -3.4          | -4.2   | -2.6   | -3.1   | -3.8   | -2.9   |
| 36  |               | 3RZB   | -7.0            | -6.1          | -5.6   | -5.5   | -5.4          | -6.2   | -4.5   | -4.8   | -5.6   | -4.6   |
| 37  |               | 3RPY   | -7.0            | -5.6          | -5.2   | -4.9   | -5.1          | -6.0   | -4.5   | -4.8   | -5.5   | -4.6   |
| 38  |               | 3R28   | -4.8            | -3.2          | -2.8   | -2.4   | -2.7          | -3.6   | -2.6   | -2.6   | -3.2   | -2.4   |
| 39  |               | 3QZI   | -4.6            | -3.5          | -3.2   | -2.8   | -3.1          | -3.9   | -3.0   | -3.0   | -3.5   | -2.8   |
| 40  |               | 3SXF   | -3.8            | -2.7          | -2.5   | -2.2   | -2.3          | -3.0   | -1.9   | -2.0   | -2.7   | -1.8   |
| 41  |               | 2R3P   | -6.1            | -4.2          | -3.8   | -3.5   | -3.8          | -4.6   | -3.4   | -3.6   | -4.3   | -3.5   |
| 42  | Salt bridge   | 3MA3   | -111.0          | -111.0        | -110.5 | -110.5 | -110.9        | -111.2 | -110.7 | -110.6 | -110.4 | -110.1 |
| 43  |               | 4L9I   | -100.3          | -101.6        | -101.2 | -101.0 | -100.6        | -101.2 | -99.6  | -100.2 | -100.3 | -99.6  |
| 44  |               | 1NVQ   | -100.0          | -99.4         | -99.3  | -98.9  | -100.1        | -99.9  | -99.5  | -99.2  | -99.2  | -98.8  |
| 45  |               | 4JIK   | -115.9          | -115.6        | -115.5 | -115.4 | -116.1        | -116.2 | -115.4 | -115.0 | -115.4 | -114.6 |
| 46  |               | 1BX6   | -68.2           | -70.1         | -69.0  | -69.4  | -68.3         | -68.3  | -67.8  | -68.3  | -68.1  | -68.1  |
| 47  |               | 4WG4   | -92.6           | -94.0         | -93.2  | -93.3  | -92.8         | -93.3  | -92.4  | -92.7  | -92.6  | -92.2  |
| 48  |               | 4MTA   | -106.6          | -107.1        | -106.8 | -106.6 | -107.0        | -107.4 | -105.8 | -106.1 | -106.4 | -105.6 |
| 49  |               | 1E9H   | -101.5          | -101.3        | -100.6 | -100.6 | -101.4        | -101.8 | -101.6 | -101.2 | -100.9 | -100.6 |

**Table S3.** Gas phase intermolecular interaction energies (in kcal/mol) at the DFT/Def2-QZVP level for the 49 binding motifs of PKIs in protein kinases

| No. | Interaction   | PDB ID | CCSD(T)/<br>CBS | DFT/Def2-QZVP |      |      |               |       |       |        |        |        |
|-----|---------------|--------|-----------------|---------------|------|------|---------------|-------|-------|--------|--------|--------|
|     |               |        |                 | BLYP          | TPSS | B97  | $\omega$ B97X | B3LYP | M062X | PW6B95 | B2PLYP | PWPB95 |
| 1   | CH- $\pi$     | 1H1Q   | -1.9            | -1.7          | -1.5 | -1.8 | -1.8          | -1.8  | -1.5  | -1.6   | -1.6   | -1.5   |
| 2   |               | 4BDB   | -2.2            | -2.2          | -2.4 | -2.6 | -2.6          | -2.2  | -1.4  | -2.4   | -2.1   | -2.1   |
| 3   |               | 2BTS   | -2.4            | -2.3          | -2.2 | -2.6 | -2.6          | -2.4  | -1.5  | -2.1   | -2.1   | -1.8   |
| 4   |               | 2XIY   | -2.3            | -2.1          | -2.1 | -2.4 | -2.5          | -2.2  | -1.6  | -2.2   | -2.0   | -2.0   |
| 5   |               | 1UU9   | -3.6            | -3.7          | -3.6 | -4.1 | -4.0          | -3.7  | -2.4  | -3.2   | -3.4   | -3.0   |
| 6   |               | 2IO6   | -0.7            | -0.7          | -0.8 | -0.9 | -0.7          | -0.7  | -0.1  | -0.7   | -0.6   | -0.6   |
| 7   |               | 4GUE   | -3.4            | -3.3          | -3.1 | -3.6 | -3.7          | -3.4  | -2.6  | -3.2   | -3.1   | -2.9   |
| 8   |               | 3OOG   | -1.9            | -1.8          | -1.6 | -1.9 | -2.0          | -1.9  | -1.5  | -1.7   | -1.6   | -1.5   |
| 9   |               | 4FKO   | -2.3            | -2.5          | -2.5 | -2.9 | -2.6          | -2.5  | -1.1  | -2.0   | -2.2   | -1.8   |
| 10  |               | 3QL8   | -2.5            | -2.5          | -2.3 | -2.9 | -2.7          | -2.5  | -1.9  | -2.3   | -2.2   | -2.1   |
| 11  |               | 4RC2   | -2.1            | -2.0          | -2.0 | -2.5 | -2.4          | -2.1  | -1.4  | -1.6   | -1.9   | -1.5   |
| 12  |               | 4RC3   | -1.0            | -0.9          | -0.8 | -1.1 | -1.0          | -1.0  | -0.6  | -0.6   | -0.7   | -0.5   |
| 13  |               | 3QX4   | -1.0            | -0.9          | -1.0 | -1.2 | -1.1          | -1.0  | -0.5  | -0.9   | -0.8   | -0.8   |
| 14  | $\pi$ - $\pi$ | 2V7O   | -1.3            | -1.5          | -1.5 | -1.7 | -1.3          | -1.4  | -0.3  | -1.2   | -1.3   | -1.0   |
| 15  |               | 3I4B   | -1.0            | -1.0          | -1.3 | -1.3 | -1.2          | -1.0  | -0.5  | -1.2   | -1.0   | -1.0   |
| 16  |               | 4DGO   | -4.4            | -4.6          | -4.4 | -4.9 | -4.7          | -4.6  | -3.6  | -4.4   | -4.3   | -4.2   |
| 17  |               | 3QQF   | -2.4            | -2.2          | -2.3 | -2.5 | -2.3          | -2.4  | -1.7  | -2.2   | -2.3   | -2.1   |
| 18  |               | 3B2T   | -2.0            | -1.8          | -2.0 | -2.1 | -1.9          | -1.9  | -1.0  | -1.8   | -1.8   | -1.7   |
| 19  |               | 3R6X   | -1.9            | -1.9          | -1.9 | -2.2 | -1.8          | -2.0  | -1.1  | -1.7   | -1.8   | -1.6   |
| 20  |               | 4WG4   | -0.6            | -0.5          | -0.7 | -0.7 | -0.6          | -0.5  | 0.0   | -0.6   | -0.5   | -0.5   |
| 21  |               | 1PXN   | -0.7            | -0.7          | -0.9 | -0.9 | -0.8          | -0.7  | 0.0   | -0.7   | -0.6   | -0.5   |
| 22  |               | 3ROY   | -2.4            | -2.2          | -2.3 | -2.5 | -2.3          | -2.4  | -1.7  | -2.2   | -2.3   | -2.1   |
| 23  |               | 2C6O   | -1.1            | -0.9          | -1.2 | -1.2 | -1.1          | -1.0  | -0.4  | -1.1   | -1.0   | -1.0   |
| 24  |               | 3RAK   | -1.7            | -1.6          | -1.7 | -1.9 | -1.7          | -1.7  | -0.9  | -1.5   | -1.6   | -1.4   |
| 25  |               | 4EL9   | -1.9            | -2.2          | -2.1 | -2.5 | -2.1          | -2.0  | -1.1  | -1.7   | -1.9   | -1.6   |
| 26  | Cation- $\pi$ | 1PXL   | -6.5            | -6.5          | -6.6 | -6.6 | -6.6          | -6.6  | -6.3  | -6.7   | -6.6   | -6.6   |
| 27  |               | 1FGI   | -4.4            | -4.8          | -4.9 | -5.0 | -4.5          | -4.7  | -3.7  | -4.6   | -4.5   | -4.4   |

(Continued)

Table S3 (Continued)

| No. | Interaction | PDB ID | CCSD(T)/<br>CBS | DFT/Def2-QZVP |        |        |               |        |        |        |        |         |
|-----|-------------|--------|-----------------|---------------|--------|--------|---------------|--------|--------|--------|--------|---------|
|     |             |        |                 | BLYP          | TPSS   | B97    | $\omega$ B97X | B3LYP  | M062X  | PW6B95 | B2PLYP | PWBPB95 |
| 28  |             | 1M2Q   | -2.0            | -2.7          | -2.7   | -2.9   | -2.2          | -2.4   | -1.0   | -2.2   | -2.1   | -1.9    |
| 29  |             | 2VGP   | -1.5            | -1.6          | -1.7   | -1.8   | -1.6          | -1.6   | -1.4   | -1.6   | -1.5   | -1.6    |
| 30  |             | 3OWP   | -9.2            | -10.0         | -9.9   | -10.3  | -9.9          | -9.9   | -8.7   | -9.6   | -9.4   | -9.3    |
| 31  |             | 3SQQ   | -2.1            | -2.3          | -2.4   | -2.6   | -2.2          | -2.3   | -1.3   | -2.0   | -2.0   | -1.8    |
| 32  |             | 3RJC   | -2.1            | -2.4          | -2.4   | -2.6   | -2.2          | -2.3   | -1.5   | -2.1   | -2.1   | -1.9    |
| 33  |             | 3QTW   | -8.4            | -9.8          | -9.4   | -9.9   | -8.4          | -9.4   | -8.0   | -8.7   | -8.7   | -8.4    |
| 34  |             | 3SW4   | -6.0            | -4.6          | -4.5   | -3.9   | -4.0          | -5.2   | -3.2   | -3.4   | -4.8   | -3.5    |
| 35  |             | 3ZLY   | -4.9            | -4.0          | -3.9   | -3.5   | -3.5          | -4.2   | -2.7   | -3.1   | -4.1   | -3.2    |
| 36  |             | 3RZB   | -7.0            | -6.2          | -5.8   | -5.6   | -5.5          | -6.3   | -4.8   | -5.0   | -6.1   | -4.9    |
| 37  | H-Bonding   | 3RPY   | -7.0            | -5.7          | -5.3   | -4.9   | -5.2          | -6.0   | -4.6   | -4.8   | -5.9   | -4.9    |
| 38  |             | 3R28   | -4.8            | -3.2          | -2.9   | -2.4   | -2.8          | -3.6   | -2.6   | -2.6   | -3.5   | -2.6    |
| 39  |             | 3QZI   | -4.6            | -3.6          | -3.2   | -2.8   | -3.1          | -3.9   | -3.0   | -3.1   | -3.8   | -3.0    |
| 40  |             | 3SXF   | -3.8            | -2.8          | -2.6   | -2.3   | -2.4          | -3.1   | -2.0   | -2.1   | -3.0   | -2.1    |
| 41  |             | 2R3P   | -6.1            | -4.2          | -3.9   | -3.5   | -3.8          | -4.6   | -3.5   | -3.6   | -4.6   | -3.7    |
| 42  | Salt bridge | 3MA3   | -111.0          | -110.2        | -110.0 | -109.9 | -110.4        | -110.6 | -110.2 | -110.1 | -110.1 | -109.7  |
| 43  |             | 4L9I   | -100.3          | -101.1        | -100.9 | -100.6 | -100.3        | -100.8 | -99.4  | -99.9  | -100.2 | -99.5   |
| 44  |             | 1NVQ   | -100.0          | -99.0         | -99.1  | -98.6  | -99.8         | -99.6  | -99.2  | -98.9  | -99.2  | -98.7   |
| 45  |             | 4JIK   | -115.9          | -114.9        | -115.0 | -114.8 | -115.6        | -115.6 | -115.1 | -114.5 | -115.2 | -114.2  |
| 46  |             | 1BX6   | -68.2           | -69.8         | -68.9  | -69.2  | -68.2         | -68.2  | -67.8  | -68.2  | -68.0  | -68.0   |
| 47  |             | 4WG4   | -92.6           | -93.5         | -92.9  | -92.9  | -92.5         | -93.0  | -92.2  | -92.4  | -92.4  | -92.0   |
| 48  |             | 4MTA   | -106.6          | -106.6        | -106.5 | -106.2 | -106.7        | -107.0 | -105.4 | -105.8 | -106.3 | -105.4  |
| 49  |             | 1E9H   | -101.5          | -100.9        | -100.3 | -100.3 | -101.2        | -101.5 | -101.3 | -100.9 | -100.9 | -100.6  |
